# Supplementary material for: Schizophrenia is associated with an increase in cortical microRNA biogenesis
Source: PubMed Central journal article supplement — Mol Psychiatry. 2009 Sep 1;15(12):1176–89. doi: 10.1038/mp.2009.84 (PMC2990188; doi:10.1038/mp.2009.84), 2009-09-01
Supplement: mp200984x3.pdf [file mp200984x3.pdf]

**Supplementary Table 3 - Total RNA analysis**

| Sample Pair | Controls | Schizophrenia | Ratio (sz/ctr) | Fold change |
|-------------|----------|---------------|----------------|-------------|
| 1           | 0.5591   | 0.4910        | 0.8782         | -1.1386     |
| 2           | 0.3876   | 1.1565        | 2.9838         | 2.9838      |
| 3           | 0.4292   | 0.5366        | 1.2502         | 1.2502      |
| 4           | 0.2925   | 0.5211        | 1.7815         | 1.7815      |
| 5           | 0.5847   | 0.6840        | 1.1699         | 1.1699      |
| 6           | 0.4699   | 0.6501        | 1.3834         | 1.3834      |
| 7           | 0.2931   | 0.3963        | 1.3524         | 1.3524      |
| 8           | 0.8053   | 0.6484        | 0.8052         | -1.2419     |
| 9           | 0.5083   | 0.6709        | 1.3198         | 1.3198      |
| 10          | 0.4128   | 0.5915        | 1.4330         | 1.4330      |
| 11          | 0.4465   | 0.6497        | 1.4553         | 1.4553      |
| 12          | 0.3373   | 0.7120        | 2.1110         | 2.1110      |
| 13          | 0.4243   | 0.6851        | 1.6148         | 1.6148      |
| 14          | 0.4362   | 0.5872        | 1.3460         | 1.3460      |
| 15          | 0.3089   | 0.1395        | 0.4515         | -2.2147     |
| 16          | 0.3748   | 0.2134        | 0.5694         | -1.7561     |
| 17          | 0.3668   | 0.1981        | 0.5399         | -1.8521     |
| 18          | 0.1521   | 0.3763        | 2.4746         | 0.0614      |
| 19          | 0.5035   | 0.1715        | 0.3407         | -2.9354     |
| 20          | 0.2721   | 0.4285        | 1.5749         | 1.5749      |
| 21          | 0.2197   | 0.2659        | 1.2104         | 1.2104      |

|                | Controls | Schizophrenia |
|----------------|----------|---------------|
| Average        | 0.4088   | 0.5130        |
| SD             | 0.14     | 0.24          |
| Ratio (sz/ctr) | 1.26     |               |
| p value        | 0.0471   | (un-paired)   |
|                | 0.0281   | (paired)      |

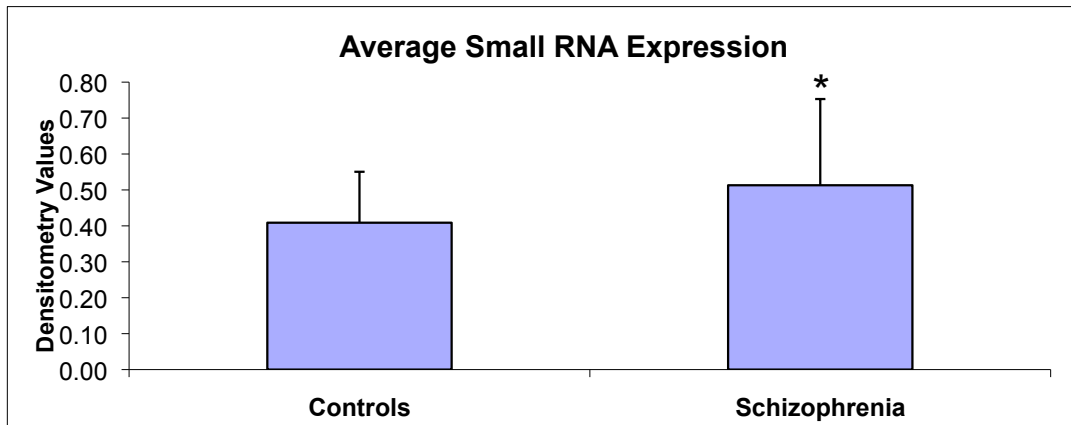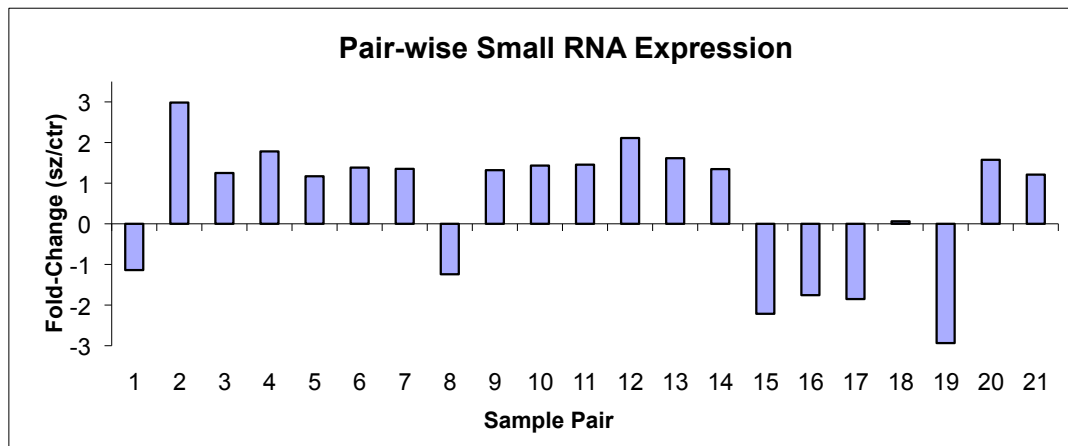

Electrophoresis of dephosphorylated total RNA labeled with PNK (n = 21 schizophrenia samples, n = 21 matched controls). Lane densitometry of the phosphorimage was normalized to the ~75nt band in each lane. Average small RNA expression (20-24nt) is 1.26-fold higher in the schizophrenia cohort compared to the controls. Pair-wise analysis indicates that small RNA expression is higher in the schizophrenia cohort in 15 of the 21 matched pairs.
